# Supplementary material
Source: PubMed Central journal article supplement (PMC4768742)

|    |                                                |     |
|----|------------------------------------------------|-----|
| 1  | Supplement                                     |     |
| 2  |                                                |     |
| 3  | eMethods.1 ROI Definitions                     | p2  |
| 4  | eMethods.2 PET Kinetic Methods and Simulations | p2  |
| 5  | eTable.1 Simulation Results                    | p5  |
| 6  | eMethods.3 fMRI Methods                        | p6  |
| 7  | eMethods.4 Adjusted Hit Rate Definition        | p8  |
| 8  | eResults.1 Drug Free vs. Drug Naïve            | p8  |
| 9  | eTable.2 $V_T$ Results                         | p8  |
| 10 | eReferences. Supplement References             | p9  |
| 11 | eFigure.1 Supplement Figure 1                  | p10 |
| 12 |                                                |     |
| 13 |                                                |     |
| 14 |                                                |     |
| 15 |                                                |     |

16  
17  
18  
19  
20  
21  
22  
23  
24  
25  
26  
27  
28  
29  
30  
31  
32  
33  
34  
35  
36  
37  
38  
39  
40  
41  
42  
43  
44  
45  
46  
47  
48  
49  
50  
51  
52  
53  
54  
55  
56  
57  
58  
59  
60  
61  
62  
63  
64  
65  
66

### **eMethods.1 Operational Definitions of Amygdala and Hippocampus ROIs.**

The amygdala and hippocampus are both identified by visual inspection on subjects' coronally oriented T1-weighted structural images as gray matter tissue in the medial temporal lobe. The anterior boundary of the amygdala is the first coronal slice on which the anterior commissure appears. The amygdala continues to be outlined on coronal slices moving in the posterior direction until the first slice on which the lateral horn of the temporal ventricle appears. A horizontal line (parallel to the anterior commissure) is drawn from the most superior part of the ventricle, and amygdala continues to be identified as the medial temporal gray matter superior to this line. The line at the most superior point of the ventricle and the amygdala continue to be drawn on successive posterior slices until the amygdala is no longer visible. The anterior boundary of the hippocampus is defined as the first (most anterior) coronal slice on which the horizontal line superior to the ventricle is drawn. Hippocampus is defined as the medial temporal lobe gray matter inferior to the line. The hippocampus continues to be drawn on successive posterior slices inferior to the line where the line is identified, and posterior to the amygdala and ventricle until the hippocampus is no longer visible.

### **eMethods.2 PET Kinetic Method**

To address the issues of low signal-to noise ratio of [ $^{11}\text{C}$ ] FLB457 cortical specific binding as well as the poor suitability of the cerebellum as a reference tissue, a kinetic approach utilizing a modified two tissue compartment model was applied. In this method, the rate constant  $k_4$ , and  $V_{\text{ND}}$ , the distribution volume of the nondisplaceable compartment, were fitted to a single value across regions, whereas the delivery constant  $K_1$  and the rate constant  $k_3$  were fitted in each region and condition. The method was applied separately to the 9 cortical regions and the 5 moderate binding subcortical regions examined in the study. The reason for separating the low and moderate binding regions was the possibility that  $k_3$  and  $k_4$  estimates might be correlated, with moderate binding regions having a lower estimated value of  $k_4$  than low binding regions. In theory,  $k_4$  is the dissociation rate of the tracer from the receptor and is independent of  $k_3$ , but in reality the estimated quantities tend to be correlated, and this approach allowed for the optimization routine to converge to fitted values appropriate to the two different ranges of  $k_3$ . In the simulations, two versions of the method were compared: One in which the same values of  $k_4$  and  $V_{\text{ND}}$  were estimated for both the baseline and post-amphetamine scan (the 2 scan method), and a second version in which  $k_4$  and  $V_{\text{ND}}$  were fitted separately for baseline and post-amphetamine (1 scan method). To test which approach is more accurate, simulations were performed in which the model assumptions (uniform  $k_4$  and  $V_{\text{ND}}$  across regions and/or scans) were intentionally violated and estimated values of  $V_{\text{T}}$ ,  $\text{BP}_{\text{ND}}$  and their percent change across conditions were compared to the (simulated) true values. For completeness, standard 2TC fits with all 4 rate constants fitted in each region and condition, using cerebellum as a reference tissue, were performed as well.

*Simulation Methods.* Each modeling assumption was tested with a set of 250 Monte Carlo simulations with 9 simulated cortical regions, a simulated cerebellum, and mean decrease in  $\text{BP}_{\text{ND}}$  following amphetamine of 5%. For each of the 250 runs in a simulation, rate constants [ $K_1$ ,  $k_2$ ,  $k_3$ ,  $k_4$ ] for the baseline condition were generated as the mean observed across cortical regions in the real data, plus a Gaussian random variable with standard deviation of 10% of the mean parameter value. Rate constants for the post-amphetamine condition were set to the same value as baseline with  $k_3$  decreased across regions by uniform random variables ranging between 0 and 10% of the baseline value (mean decrease of 5%). Pairs of arterial plasma input functions were selected randomly from among the baseline/post-amphetamine pairs of input functions in the real study data, and continuous time activity curves were generated. These were subsampled at the mid-frame times of the collected data to generate discrete time activity curves comparable to the reconstructed PET data, and an additional layer of mean-zero noise with standard deviation equal to 2.5% of the interpolated values was added. These data were then fitted by the 1 scan, 2 scan and 2TC methods, with weighting as in the main study.  $V_{\text{T}}$  was computed in every case.  $\text{BP}_{\text{ND}}$  was computed as the estimated  $k_3/k_4$  ratio for the 1 scan and 2 scan methods and both as  $k_3/k_4$  and indirectly

67 using the cerebellum  $V_T$  as an estimate of  $V_{ND}$  (overestimated by 20%, by design, assuming specific  
68 binding in cerebellum) for the 2TC method, for comparison. The tested conditions were i) variability in  $k_4$   
69 across regions, ii) change in  $k_4$  between scan conditions, iii) change of  $V_{ND}$  across scan conditions and  
70 combinations of I, ii and iii. To test i)  $k_4$  was varied across regions by a Gaussian random variable with  
71 standard deviation equal to 5% of the mean. To test ii)  $k_4$  was varied between scans, with post-  
72 amphetamine  $k_3$  readjusted by the same amount such that the post-amphetamine decrease in  $BP_{ND}$  was  
73 preserved. These were tested at the 5% and 10% standard deviation levels for  $k_4$ , as both Gaussian and  
74 uniform random variables, with the latter representing the case in which all amphetamine effect was  
75 attributable to reduced affinity, i.e. increased  $k_4$ . To test iii),  $V_{ND}$  was varied between scan conditions,  
76 again with a Gaussian random variable with standard deviation equal to 5% or 10% of the baseline value.  
77 Finally combinations of ii and iii, i.e. simultaneous changes of both  $k_4$  and  $V_{ND}$  across conditions, were  
78 tested.

79  
80 *Results.* Representative results are shown in Table S1. The table shows the ordinary regression slopes and  
81 intercepts of the fitted parameters against the simulated true parameters, along with Pearson correlation  
82 coefficients, for each of the 2250 fits for a representative set of simulation conditions. The 2 scan and 1  
83 scan methods both outperformed conventional 2TC under all conditions. This includes  $BP_{ND}$  and  
84  $\Delta BP_{ND}$  where the simulated specific binding in cerebellum could be expected to affect the outcome, but  
85 also accuracy and precision of baseline and post-amphetamine  $V_T$ , where many of the tested conditions  
86 would have appeared a priori to favor the greater flexibility of 2TC (data not shown). Under all of the  
87 tested conditions, the 2 scan method was more accurate than the 1 scan method. Surprisingly, this included  
88 all simulations in which  $k_4$  or  $V_{ND}$  was changed across conditions, which might be expected to favor the 1  
89 scan method. We conclude that the simulations support the 2 scan method as being the most sensitive  
90 approach for extracting  $\Delta BP_{ND}$  and  $\Delta V_T$  using [ $^{11}C$ ]FLB457 with amphetamine challenge.

91  
92 *Discussion.* In this study, we applied a kinetic method that would simultaneously address the low signal in  
93 cortex, the low expected change in that signal across the tested conditions, and the lack of a suitable  
94 reference tissue. Our method fitted single values of  $V_{ND}$  and  $k_4$  across brain regions and scans for each  
95 subject. The assumption of single  $V_{ND}$  is widely accepted, and in fact implicit in the interpretation of  
96  $\Delta BP_{ND}$  as reflecting changes in specific binding only. The use of a single  $k_4$  is less conventional, though  
97 not unique to this study<sup>1</sup>. There is some evidence suggesting that measured  $k_4$  may vary across regions  
98 due to differing microenvironments<sup>2</sup>. Additionally, on statistical grounds, data fitting algorithms could  
99 conceivably provide correlated parameter estimates, for example, estimating  $BP_{ND}$  in high binding regions  
100 by a combination of both large  $k_3$  and small  $k_4$ . The simulations here showed that even when the  
101 underlying compartment model incorporated all of these conditions that do not conform to the 2 scan model  
102 assumptions, the 2 scan method still outperformed all other methods, due to the increased parsimony  
103 associated with estimating 38 parameters per subject, rather than 40 for the 1 scan method or 80 for 2TC.  
104 One reasonable concern when applying this approach is identifiability of  $V_{ND}$  and  $BP_{ND}$ , i.e. that the  
105 partition of total distribution volume  $V_T$  into its component factors  $V_{ND}$  and  $(1 + BP_{ND})$  from direct  
106 estimation of these may not represent the true physiological parameters in the absence of additional  
107 information to formulate constraints in the data fitting process. To address this concern, we also measured  
108 and reported total  $V_T$  and  $\Delta V_T$  and found these to be most precisely measured by the 2 scan method as  
109 well. We expected, a priori, that  $\Delta V_T$  would be less than  $\Delta BP_{ND}$  because a portion of  $V_T$  is  $V_{ND}$  which  
110 should not be affected by DA release. In fact, in the study data we did see that  $\Delta V_T < \Delta BP_{ND}$  in HC, but  
111 the blunting in SCZ and significant group differences were still detectable. As noted in the main article,  
112 average estimated  $V_{ND}$ ,  $2.97 \pm 0.87$  in SCZ and  $3.27 \pm 0.55$ , is in approximate accord with the Narendran  
113 study<sup>3</sup> in that cerebellum  $V_T$  measured here was  $4.19 \pm 0.95$  in SCZ and  $4.56 \pm 1.08$  in HC, corresponding  
114 to  $V_{ND}$  equaling  $70 \pm 13\%$  of cerebellum  $V_T$  in SCZ and  $73 \pm 10\%$  in HC. Nevertheless, we cannot claim  
115 to have measured physiological  $V_{ND}$  by this method without further validation, for example through

116 blocking studies. Our simulations do however strongly suggest that the approach improves estimation of  
117  $\Delta V_T$  and  $\Delta BP_{ND}$  compared to methods that measure within subject regional parameters independently.  
118  
119  
120

121  
122

eTable.1 Simulation Results for  $\Delta BP_{ND}$  and  $\Delta VT$

| Condition: $k_4$ varies within scan (Gaussian, 5% SD) across regions but not between scans                                 |        |           |        |            |
|----------------------------------------------------------------------------------------------------------------------------|--------|-----------|--------|------------|
|                                                                                                                            | slope  | intercept | R      | % Outliers |
| $\Delta BP$ 2TC indirect                                                                                                   | 1.0077 | 0.0083    | 0.0073 | 14%        |
| $\Delta BP$ 2TC                                                                                                            | 1.1703 | 0.0270    | 0.0333 | 0.3%       |
| $\Delta BP$ 1 scan                                                                                                         | 1.0326 | 0.0206    | 0.0405 | 0          |
| $\Delta BP$ 2 scan                                                                                                         | 1.0157 | 0.0009    | 0.5106 | 0          |
| $\Delta VT$ 2TC                                                                                                            | 1.1550 | 0.0141    | 0.0609 | 0.4%       |
| $\Delta VT$ 1 scan                                                                                                         | 1.0234 | 0.0033    | 0.2203 | 0          |
| $\Delta VT$ 2 scan                                                                                                         | 1.0084 | 0.0004    | 0.5078 | 0          |
| Condition: $k_4$ varies within scan (Gaussian, 5% SD) and between scans (uniform between 0 and 10%)                        |        |           |        |            |
|                                                                                                                            | slope  | intercept | R      | % Outliers |
| $\Delta BP$ 2TC indirect                                                                                                   | 1.1776 | -0.0031   | 0.0104 | 0.3%       |
| $\Delta BP$ 2TC                                                                                                            | 1.0388 | 0.0205    | 0.0265 | 0.0027     |
| $\Delta BP$ 1 scan                                                                                                         | 1.1552 | 0.0249    | 0.0478 | 0          |
| $\Delta BP$ 2 scan                                                                                                         | 1.0238 | 0.0203    | 0.4779 | 0          |
| $\Delta VT$ 2TC                                                                                                            | 1.1816 | 0.0068    | 0.0699 | 0.1%       |
| $\Delta VT$ 1 scan                                                                                                         | 1.0018 | -0.0014   | 0.1920 | 0          |
| $\Delta VT$ 2 scan                                                                                                         | 1.0224 | 0.0136    | 0.4781 |            |
| Condition: $V_{ND}$ varies between conditions (Gaussian, SD = 5%)                                                          |        |           |        |            |
|                                                                                                                            | slope  | intercept | R      | % Outliers |
| $\Delta BP$ 2TC indirect                                                                                                   | 1.1424 | -0.0215   | 0.0109 | 15%        |
| $\Delta BP$ 2TC                                                                                                            | 0.9151 | 0.0082    | 0.0222 | 0.1%       |
| $\Delta BP$ 1 scan                                                                                                         | 1.1581 | 0.0167    | 0.0812 | 0          |
| $\Delta BP$ 2 scan                                                                                                         | 1.0656 | 0.0057    | 0.1414 | 0          |
| $\Delta VT$ 2TC                                                                                                            | 0.9993 | 0.0041    | 0.2930 | 0.1%       |
| $\Delta VT$ 1 scan                                                                                                         | 0.9771 | -0.0029   | 0.7182 | 0          |
| $\Delta VT$ 2 scan                                                                                                         | 0.9626 | -0.0017   | 0.8783 | 0          |
| Condition: $k_4$ varies within (Gaussian, SD = 5%), between (uniform 0 to 10%) $V_{ND}$ varies between (Gaussian, SD = 5%) |        |           |        |            |
|                                                                                                                            | slope  | intercept | R      | % Outliers |
| $\Delta BP$ 2TC indirect                                                                                                   | 0.9094 | 0.0239    | 0.0079 | 15%        |
| $\Delta BP$ 2TC                                                                                                            | 0.9851 | 0.0185    | 0.0241 | 0.3%       |
| $\Delta BP$ 1 scan                                                                                                         | 0.9996 | 0.0188    | 0.0658 | 0          |
| $\Delta BP$ 2 scan                                                                                                         | 0.9969 | 0.0108    | 0.1245 | 0          |
| $\Delta VT$ 2TC                                                                                                            | 1.0429 | 0.0051    | 0.2859 | 0.2%       |
| $\Delta VT$ 1 scan                                                                                                         | 1.0269 | -0.0016   | 0.7280 | 0          |
| $\Delta VT$ 2 scan                                                                                                         | 0.9731 | 0.0057    | 0.8606 | 0          |

123  
124  
125  
126  
127  
128  
129

Regression of parameter estimates for each method against true simulation parameters.  $\Delta BP$  2TC indirect used cerebellum VT to estimate regional BPND indirectly as a function of distribution volumes. Cerebellum VT was set to 20% greater than VND. The other 2TC method used direct estimation of  $k_3/k_4$  for BPND. Fits for which  $|\Delta BPND| > 80\%$  or  $|\Delta VT| > 100\%$  were considered outliers and not included in the regression.

### eMethods.3 fMRI Methods

*SOWT Task.* The participants completed 24 trials of the SOWT, with each trial containing eight steps on which response was required. At the start of each trial, eight simple line drawings of three-dimensional objects were presented in a  $3 \times 3$  grid, with the central position of the grid being empty. The stimuli were the same as those used by Curtis and colleagues<sup>4</sup>. Unique stimuli were used on each of the first 12 trials, and stimuli were repeated exactly once during the latter 12 trials. On each step, participants had 7 s to move a mouse cursor to select any object that had not been selected on a previous trial (thus, all responses were correct on the first step). Once a selection was made, a white outline was displayed around the selected object until 9 s had elapsed from the start of the step. At this point, the objects in the display were pseudo-randomly rearranged in the grid, with the blank space appearing in the same location as the most recently selected item (to prevent participants from using a spatial strategy or simply responding in the same location on each trial). If no response was made within 7 s, a white outline was displayed for 2 s around a randomly selected object that would have been a correct response; participants were instructed to remember this object as if they had selected it themselves. If an incorrect selection was made, a red box was displayed over the object until 7 s had elapsed from the start of the step, after which the same procedure was followed as in the case when a participant made no response. The ITI was 9 s.

*Data acquisition.* Imaging was carried out on a Philips 1.5 Tesla Intera scanner at the Columbia Radiology MRI Center at the Neurological Institute of New York. Participants lay supine on the scanner bed while viewing stimuli projected onto a screen located at the foot of the scanner bed through a mirror mounted on the head coil. The cursor was controlled with a hand-held fiber optic trackball with buttons on either side. T1-weighted images were obtained with an SPGR sequence with a 256 mm FOV, 200 slices, and 1 mm isotropic voxels. Whole-brain functional EPIs were obtained using an 8-channel SENSE coil with a 2 s TR, 28 ms TE, 77° flip angle, 192 mm field of view, 40 slices, 3 mm isotropic voxels, and SENSE factor of 1.5. The relatively small slice thickness precluded acquisition of data on the ventral most portion of the cerebellum in a large majority of participants; however, this region was not of particular interest in the present study. Participants completed nine runs of 160 volumes each that included either three task trials or two task trials and one control trial between the two task trials. Thirty seconds of rest occurred after each trial, and 32 seconds before the first trial in each run.

*Data preprocessing.* Preprocessing was performed with a combination of SPM8 and custom Matlab scripts. Reconstructed PAR/REC format files were obtained from the scanner and converted to 32-bit floating point precision Analyze format files. A rough in-brain mask was computed and in-brain signal values were used to identify artifactual volumes: any volume departing from a sliding window by more than eight mean absolute deviations in terms of either mean global signal or Mahalanobis distance was identified and treated as a nuisance regressor during first-level statistical analyses.

Data then underwent slice-timing correction using SPM8 and motion realignment using INRIAlign (Freire, Roche, & Mangin, 2002). Motion realignment parameters were inspected to detect excessive motion; one run from each of two participants (one patient and one control) were excluded from analyses due to translation greater than 2.5 mm or rotation greater than 2.5° from their median position during the run. EPI images were then coregistered to the individual subjects' T1 image used for drawing of ROIs for PET analyses. PET ROIs were then resliced into a 3 mm isotropic voxel space to match the EPI data, and these resliced ROIs were used on an individual-subject basis to extract BOLD activation to the task. For calculation of group-level activation maps, images underwent spatial normalization to the ICBM template using the segmentation algorithm in SPM8 and spatial smoothing with an 8 mm FWHM kernel.

*First-level statistical modeling.* Prior to first-level modeling, the value in each voxel in each volume was divided by the mean value in that voxel over the entire time-series, expressed as a percent, so that the magnitude of the first-level hemodynamic response function (HRF) estimates were equivalently scaled across runs. Data for each participant were modeled in the GLM framework implemented in SPM8. A three parameter HRF model (with temporal and dispersion derivatives) was used to estimate the Blood Oxygen Level Dependent (BOLD) response to each modeled event. An explicit mask was calculated by using the conjunction of the smoothed (6 mm FWHM) gray matter segmentation and the skull-stripped mean EPI for each subject, to restrict the analysis to regions of gray matter and regions not suffering from excessive signal dropout due to susceptibility artifacts, respectively.

A separate set of regressors was used to model each of the eight steps of the SOWT and the control task as a nine second boxcar (resulting in 27 regressors in total, due to the three parameter HRF

186 model). Although participants had only seven seconds in which to make a response, we opted to use the full  
187 nine seconds of each step in order to capture the period of time in which participants were presumably  
188 attempting to maintain previously selected items in WM. Error trials on any of the task steps and on the  
189 control task made up two separate sets of regressors (six total), again modeled as nine second boxcars. A  
190 two second boxcar was used to model the presentation of textual instructions prior to each trial, and motor  
191 responses (button presses) and error feedback (red square appearing over the incorrectly-selected item)  
192 were modeled as instantaneous events in order to prevent motor and visual activity from being confounded  
193 with other modeled events. Finally, nuisance regressors included all six motion parameters estimates (three  
194 translation parameters and three rotation parameters), the squared motion parameters, the first derivative of  
195 the motion parameters, the squared derivative of the motion parameters, and dummy regressors for  
196 artifactual scans identified as outlined above. Activation at each step of the SOWT and during the control  
197 task was quantified as the area under the curve (AUC) in a temporal window ranging from 2 s to 9 s with  
198 respect to the three basis functions defining the canonical HRF; this window corresponds to the rise and fall  
199 of the HRF following the initial dip and prior to the undershoot.

200 *Second-level statistical modeling.* Contrast images of overall task-related activation were  
201 calculated for each participant by taking the mean activation at each voxel across steps one through eight in  
202 the SOWT and subtracting the activation in the corresponding voxel in the control task. These contrast  
203 images were then tested for significance using robust regression<sup>5</sup> and thresholded at  $P < 0.05$  after false  
204 discovery rate (FDR) correction<sup>6</sup>.

205 *Relationship between fMRI BOLD with PET  $\Delta BP_{ND}$  in DLPFC.* Voxels showing significant task-  
206 related activation in either group were returned to individual-subject spaces by using the inverse of the  
207 normalization transformation produced during segmentation. BOLD percent signal change values were  
208 extracted for each subject from voxels that were significant at the group level and also fell within the  
209 DLPFC ROI drawn for a given participant. These percent signal changes values were then used in a  
210 regression model with  $\Delta BP_{ND}$ . Model selection was determined based on Akaike information criterion<sup>7</sup>.

211  
212  
213

214  
215  
216  
217  
218  
219  
220  
221  
222

**eMethods.4 Adjusted Hit Rate Formula for the N-Back Task**

The hit rate (HR) was calculated as the number of correct responses divided by the number of targets (maximum is 1, minimum is 0). The error rate (ER) was calculated as the number of errors divided by the number of non-targets (maximum is 1, minimum is 0). The adjusted HR (AHR) was calculated as HR - ER. AHR ranges from 1 (if the subject provided all the correct responses and no incorrect response) to -1 (if the subject provided no correct response and all the incorrect responses). Operating at chance level corresponds to an AHR of 0.

223  
224  
225  
226  
227  
228  
229  
230  
231  
232

**eResults.1 Drug Naïve vs Drug Free Patients**

The drug-naïve (DN) patients had higher BP<sub>ND</sub> (t = 2.96, p = 0.008) and lower ΔBP<sub>ND</sub> (t = -2.12, p = 0.048) and ΔV<sub>T</sub> (t = -2.28, p = 0.035) in the DLPFC than the drug-free (DF) patients. However, these groups differed in age (DN: 25.9 ± 7.2 years; DF: 36.1 ± 10.0 years; t = -2.24, p = 0.038). Given the well documented effect of age on cortical D2R parameters<sup>8,9</sup> analyses were repeated with age as a covariate. With age included, there are no significant group differences for BP<sub>ND</sub>, ΔBP<sub>ND</sub> or ΔV<sub>T</sub>. DLPFC BP<sub>ND</sub> and ΔBP<sub>ND</sub> do not correlate significantly with duration of illness or drug-free interval. DLPFC V<sub>T</sub> correlates negatively with duration of illness in the total group of patients (r = -0.538, p = 0.014), which is largely driven by the drug-free patients (r = -0.547, p = 0.043).

233  
234

**eTable.2 V<sub>T</sub> Results**

eTable 2. Distribution volumes (V<sub>T</sub>)

|             | HC (n = 21) |            |                 | SCZ (n = 20) |            |                 |
|-------------|-------------|------------|-----------------|--------------|------------|-----------------|
|             | Baseline    | Post-Amph  | ΔV <sub>T</sub> | Baseline     | Post-Amph  | ΔV <sub>T</sub> |
| CEREBELLUM  | 4.6 ± 1.1   | 4.4 ± 1.1  | -2.9 ± 7.5%     | 4.2 ± 1.0    | 4.3 ± 1.1  | 2.1 ± 7.8%      |
| DLPFC       | 9.2 ± 2.6   | 8.7 ± 2.4  | -4.8 ± 6.9%     | 8.1 ± 2.8    | 8.2 ± 2.8  | 0.9 ± 7.1%      |
| OFC         | 9.4 ± 2.6   | 8.9 ± 2.4  | -3.9 ± 8.4%     | 8.4 ± 3.0    | 8.5 ± 3.1  | 1.1 ± 6.8%      |
| MFC         | 9.5 ± 2.5   | 9.1 ± 2.4  | -3.2 ± 8.0%     | 8.6 ± 2.8    | 8.6 ± 2.8  | 0.2 ± 7.1%      |
| A. CING     | 10.5 ± 2.9  | 10 ± 2.7   | -3.8 ± 9.6%     | 9.4 ± 2.9    | 9.6 ± 3.0  | 2.2 ± 8.6%      |
| OCC CTX     | 9.1 ± 2.8   | 8.7 ± 2.5  | -4.3 ± 7.4%     | 8.2 ± 3.0    | 8.3 ± 3.2  | 1.1 ± 6.5%      |
| PAR CTX     | 9.8 ± 2.8   | 9.4 ± 2.6  | -4.2 ± 6.3%     | 8.8 ± 3.3    | 8.8 ± 3.3  | 0.5 ± 6.7%      |
| TEMP CT     | 14.6 ± 4.1  | 14 ± 3.9   | -4.1 ± 7.6%     | 13.1 ± 5.0   | 13.1 ± 5.1 | 0.1 ± 6.9%      |
| SUB GEN     | 11.2 ± 3.3  | 10.8 ± 2.6 | -1.6 ± 11.6%    | 10.3 ± 3.7   | 10.5 ± 3.4 | 3.1 ± 11.9%     |
| INSULA      | 14.4 ± 3.9  | 13.9 ± 3.7 | -3.2 ± 7.8%     | 13.4 ± 4.5   | 13.7 ± 4.9 | 1.8 ± 7.7%      |
| AMYGDALA    | 24.5 ± 8.9  | 23.7 ± 7.9 | -1.7 ± 13.8%    | 21.4 ± 7.2   | 21.8 ± 8.0 | 1.8 ± 9.2%      |
| HIPPOCAMPUS | 13 ± 4.6    | 12.3 ± 3.9 | -3.9 ± 10.1%    | 11.2 ± 2.8   | 11.2 ± 3.3 | 0.1 ± 8.0%      |
| SN/VTA      | 20.8 ± 6.5  | 19.9 ± 6.1 | -3.7 ± 10.5%    | 18.5 ± 5.7   | 18.9 ± 5.8 | 2.3 ± 8.9%      |
| THALAMUS    | 26.8 ± 9.3  | 25.7 ± 8.4 | -2.7 ± 10.1%    | 23.4 ± 8.7   | 23.9 ± 9.2 | 2.4 ± 8.6%      |
| UNCUS       | 17.9 ± 6.0  | 16.9 ± 5.7 | -4.7 ± 13.1%    | 15.9 ± 5.6   | 15.8 ± 6.1 | -0.9 ± 9.5%     |

235  
236  
237  
238

Region Distribution Volumes at baseline, following amphetamine, and their percent change



239  
240  
241  
242  
243  
244  
245  
246  
247  
248  
249  
250  
251  
252  
253  
254  
255  
256  
257  
258  
259  
260  
261  
262  
263  
264  
265  
266  
267  
268  
269  
270  
271  
272

## Supplement References

1. Ashworth S, Rabiner EA, Gunn RN, et al. Evaluation of <sup>11</sup>C-GSK189254 as a novel radioligand for the H3 receptor in humans using PET. *Journal of nuclear medicine : official publication, Society of Nuclear Medicine*. Jul 2010;51(7):1021-1029.
2. Votaw JR, Kessler RM, de Paulis T. Failure of the three compartment model to describe the pharmacokinetics in brain of a high affinity substituted benzamide. *Synapse*. 1993;15(3):177-190.
3. Narendran R, Mason NS, Chen CM, et al. Evaluation of dopamine D(2)/(3) specific binding in the cerebellum for the positron emission tomography radiotracer [(1)(1)C]FLB 457: implications for measuring cortical dopamine release. *Synapse*. Oct 2011;65(10):991-997.
4. Curtis CE, Zald DH, Pardo JV. Organization of working memory within the human prefrontal cortex: a PET study of self-ordered object working memory. *Neuropsychologia*. 2000;38(11):1503-1510.
5. Wager TD, Keller MC, Lacey SC, Jonides J. Increased sensitivity in neuroimaging analyses using robust regression. *NeuroImage*. May 15 2005;26(1):99-113.
6. Benjamini Y, Hochberg Y. CONTROLLING THE FALSE DISCOVERY RATE - A PRACTICAL AND POWERFUL APPROACH TO MULTIPLE TESTING. *Journal of the Royal Statistical Society Series B-Methodological*. 1995;57(1):289-300.
7. Akaike H. A new look at the statistical model identification. *IEEE Trans. Automat. Contr.* 1974;AC19:716-723.
8. Inoue M, Suhara T, Sudo Y, et al. Age-related reduction of extrastriatal dopamine D2 receptor measured by PET. *Life Sci*. Jul 20 2001;69(9):1079-1084.
9. Kaasinen V, Vilkkumäki H, Hietala J, et al. Age-related dopamine D2/D3 receptor loss in extrastriatal regions of the human brain. *Neurobiol Aging*. Sep-Oct 2000;21(5):683-688.

273 e Figure.1 Scatterplots of fitted vs true results from a representative simulation where all 3 assumptions  
 274 were violated:  $k_4$  varied across regions and increased between scan conditions and  $V_{ND}$  changed  
 275 randomly between scan conditions.  $BP_{ND}$  decreased following amphetamine randomly between 0 and  
 276 10%. In this set of simulations the  $BP_{ND}$  change was always contributed to by increased  $k_4$  across  
 277 conditions but the 2 scan method still gave the best estimates of the changes in  $BP_{ND}$  and  $V_T$  across  
 278 conditions even though the approach fits a single  $k_4$  across scans.  
 279  
 280

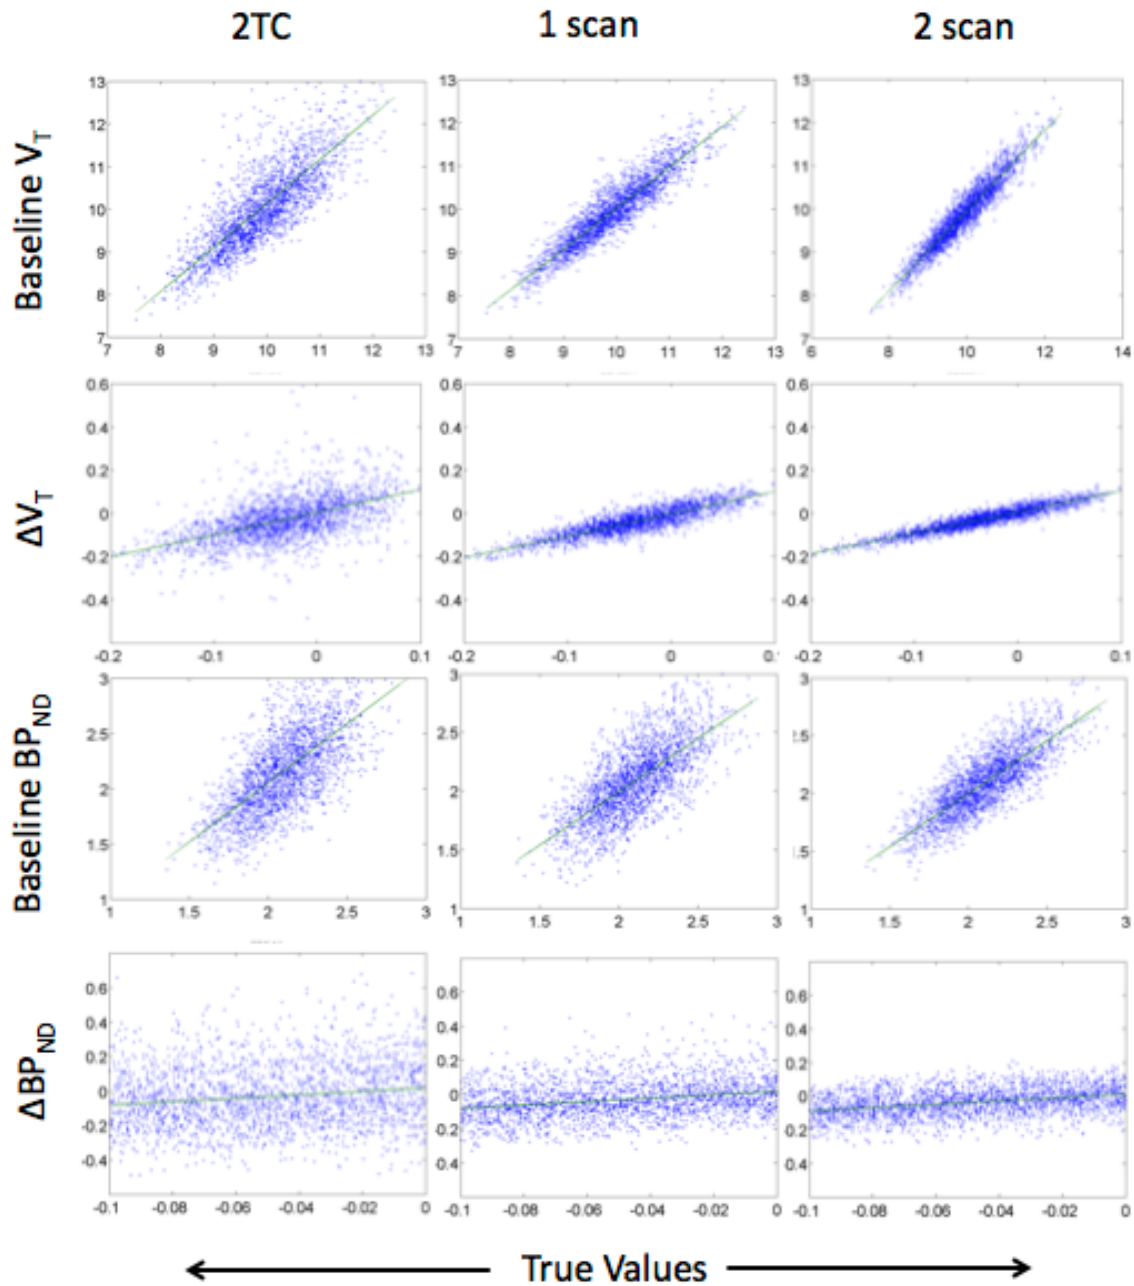

Supplement: NIHMS761883-supplement-01.pdf [file NIHMS761883-supplement-01.pdf]
